# Supplementary material for: PERI-operative biologic DMARD management: Stoppage or COntinuation during orthoPaEdic operations (the PERISCOPE trial) – a study protocol for a pragmatic, UK multicentre, superiority randomised controlled trial with an internal pilot, economic evaluation and nested qualitative study
Source: PubMed Central journal article supplement (PMC11328622; doi:10.1136/bmjopen-2024-084997), 2024-06-22
Supplement: bmjopen-14-6-s001.pdf [file bmjopen-14-6-s001.pdf]

|                                                                                                |   |   |   |  |   |  |   |  |   |
|------------------------------------------------------------------------------------------------|---|---|---|--|---|--|---|--|---|
| Eligibility Confirmation                                                                       | X |   |   |  |   |  |   |  |   |
| Medication use                                                                                 |   | X | X |  | X |  | X |  | X |
| Disease activity using a generic global NRS (physician)                                        |   | X | X |  | X |  | X |  | X |
| Disease specific outcome measures *                                                            |   | X | X |  | X |  | X |  | X |
| A modified 1992 Centre for Disease Control and prevention criteria for postoperative infection |   |   | X |  | X |  | X |  | X |
| Assessment for delayed wound healing                                                           |   |   | X |  | X |  | X |  | X |
| Adverse events                                                                                 |   |   | X |  | X |  | X |  | X |

\* Disease specific outcomes: **RA:** CDAI; **AS:** BASFI, BASDAI, ASAS-HI, NRS; **PsA:** 66/68 joint count, BSA for Skin, LEI, NRS
