# Supplementary material for: PERI-operative biologic DMARD management: Stoppage or COntinuation during orthoPaEdic operations (the PERISCOPE trial) – a study protocol for a pragmatic, UK multicentre, superiority randomised controlled trial with an internal pilot, economic evaluation and nested qualitative study
Source: PubMed Central journal article supplement (PMC11328622; doi:10.1136/bmjopen-2024-084997), 2024-06-22
Supplement: bmjopen-14-6-s002.pdf [file bmjopen-14-6-s002.pdf]

**Supplementary material 2: Proposed progression criteria to be assessed at end of 9 month internal pilot**

| Progression criteria                  | Target at end of internal pilot | Green         | Amber               | Red          |
|---------------------------------------|---------------------------------|---------------|---------------------|--------------|
| <b>Centres open</b>                   | 8                               | 100%<br>(8)   | 60-99 (5-7)         | <60 (<5)     |
| <b>Participant recruitment</b>        | 1-2 patients per site per month | 100%<br>(1-2) | 60-99<br>(0.6-<1-2) | <60 (<0.6)   |
|                                       | 79 Participants recruited       | 100%<br>(79)  | 60-99<br>(47-78)    | <60<br>(<47) |
| <b>Primary outcome data available</b> | At least 80%*                   | 100%<br>(32)  | 80-99<br>(26-<32)   | <80 (<26)    |

\*Including participants recruited in the first 6 months
